# Supplementary material for: Comparison of genomic diversity and structure of sable antelope (Hippotragus niger) in zoos, conservation centers, and private ranches in North America
Source: PubMed Central journal article supplement (PMC7463370; doi:10.1111/eva.12976), 2020-04-27

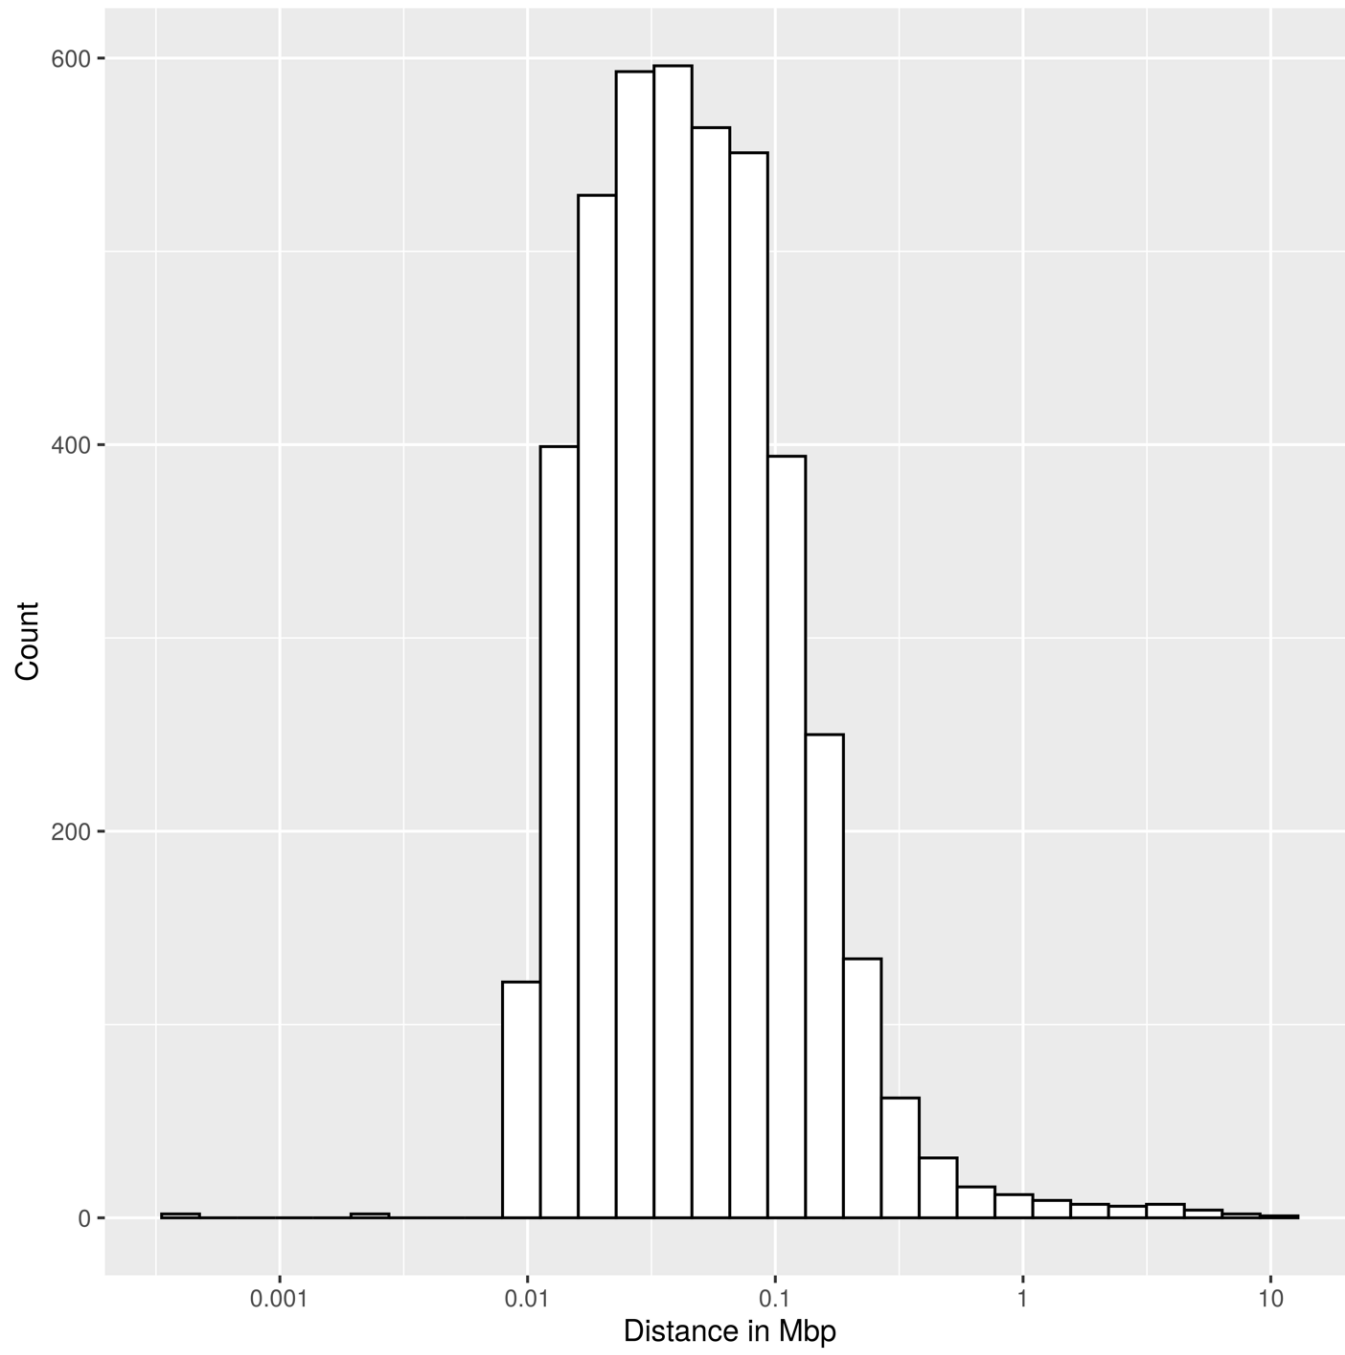

Supplement: EVA-13-2143-s001.pdf [file EVA-13-2143-s001.pdf]
